# Supplementary material for: Corrole-silica hybrid particles: synthesis and effects on singlet oxygen generation
Source: Royal Society of Chemistry journal article supplement (doi:10.1039/c2ra22133k), 2012-10-24
Supplement: c2ra22133k.pdf [file c2ra22133k.pdf]

## Corrole-Silica Hybrid Particles: Synthesis and Effects on Singlet Oxygen Generation

Joana F. B. Barata, Ana L. Daniel-da-Silva, M. Graça P. M. S. Neves, José A. S. Cavaleiro, Tito Trindade\*

Chemistry Department, CICECO and QOPNA, University of Aveiro, 3810-193 Aveiro, Portugal

|                                                                              |     |
|------------------------------------------------------------------------------|-----|
| <b>Figure SI 1</b> Photostability and stability assays.....                  | SI2 |
| <b>Figure SI 2</b> XPS wide scans.....                                       | SI2 |
| <b>Figure SI 3</b> Characteristic N 1s core line signal.....                 | SI3 |
| <b>Figure SI 4</b> Characteristic Ga 2p <sub>3/2</sub> core line signal..... | SI4 |
| <b>Figure SI 5</b> SEM images.....                                           | SI4 |
| <b>Figure SI 6</b> DPiBF absorptions decays.....                             | SI5 |

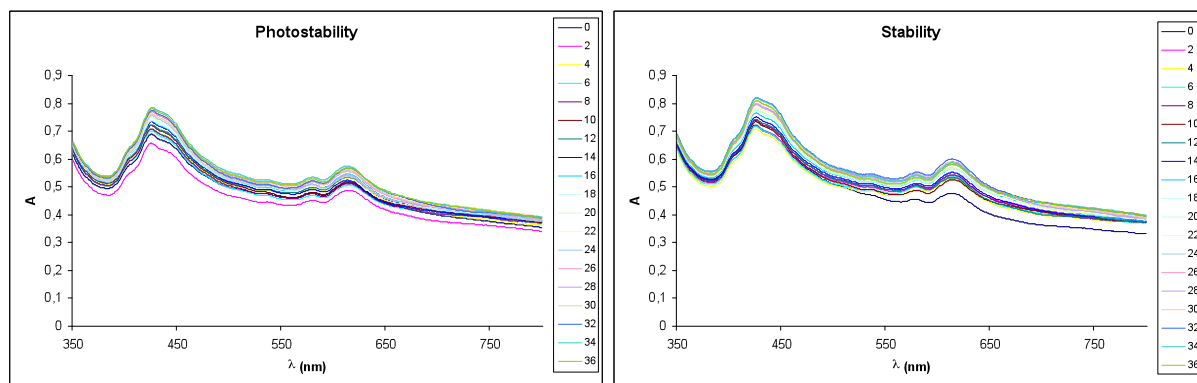

**Figure S11.** Photostability and stability of suspension of the GaPFC-APS-SiO<sub>2</sub> : (a) after irradiation with white light (25 mW.cm<sup>-2</sup>) for different periods of time; (b) stability in solution (without irradiation).

### XPS - Wide scans

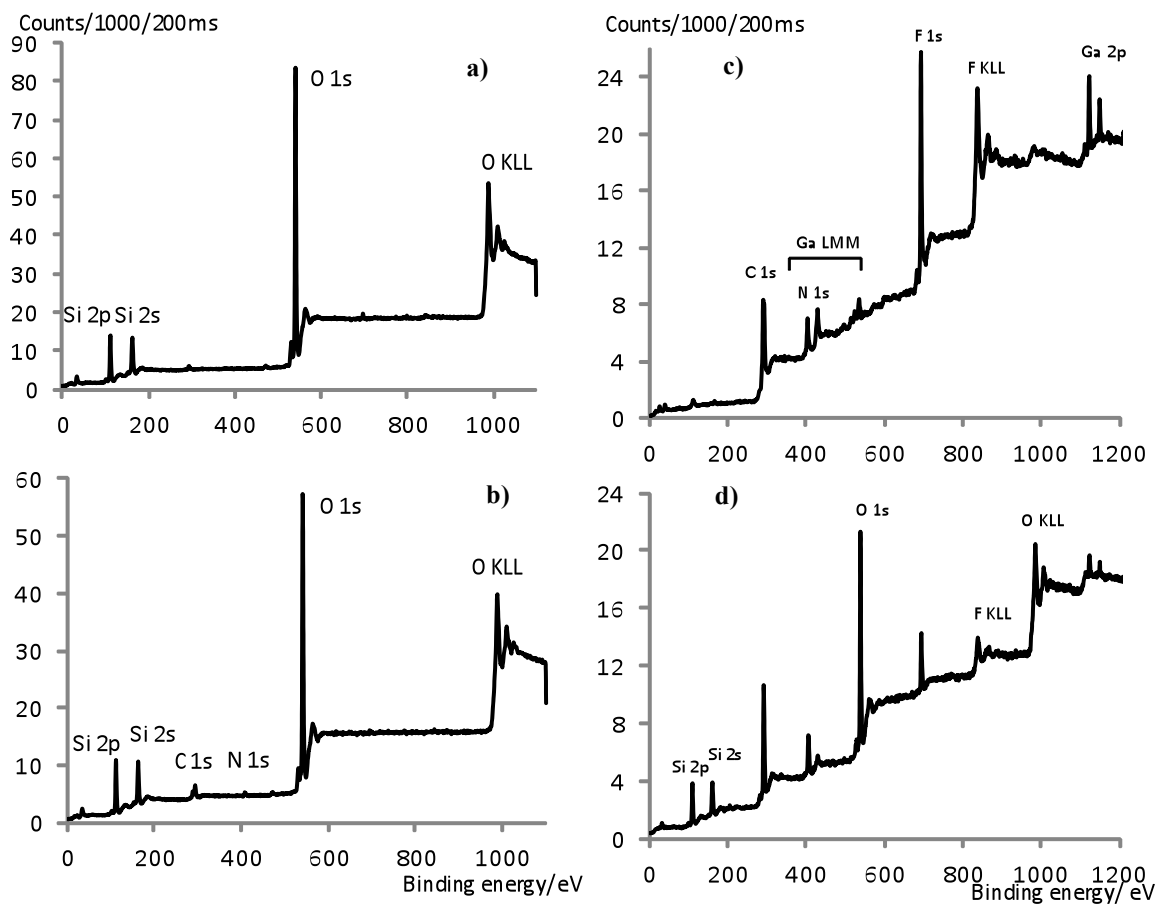

**Figure S12.** XPS survey scan of SiO<sub>2</sub> (a), APS-SiO<sub>2</sub> (b), GaPFC-APS-SiO<sub>2</sub> (c), bulk GaPFC powder (d)

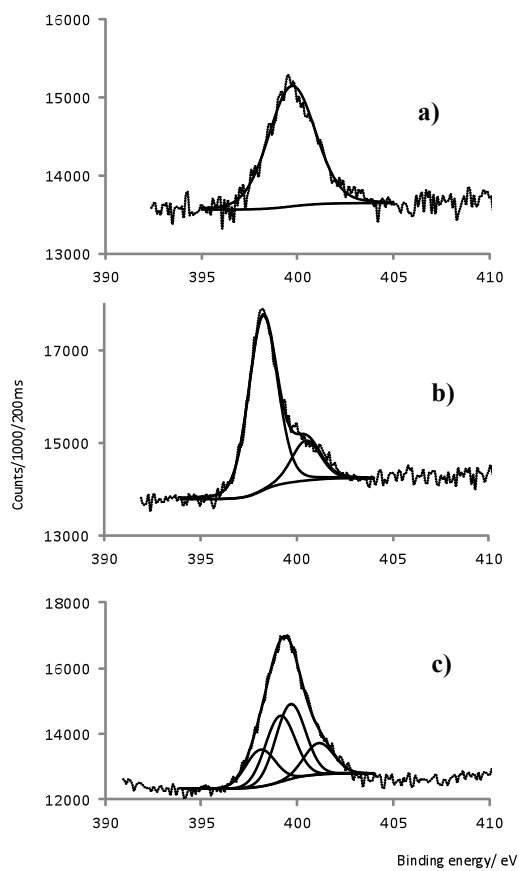

**Figure S13.** Characteristic N 1s core line signal of (a) APS-SiO<sub>2</sub>, (b) GaPFC and (c) GaPFC-APS-SiO<sub>2</sub>, respectively.

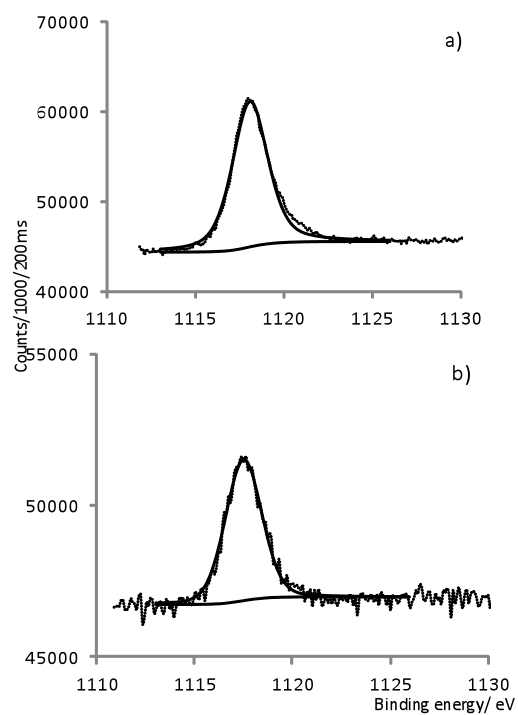

**Figure SI4.** Characteristic Ga 2p<sub>3/2</sub> core line signal of (a) GaPFC and (b) GaPFC-APS-SiO<sub>2</sub>, respectively.

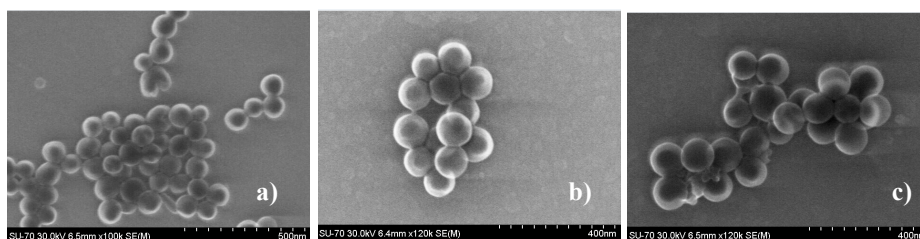

**Figure SI5.** SEM images of GaPFC-APS-SiO<sub>2</sub> a) Water, b) pH 4, c) pH 9

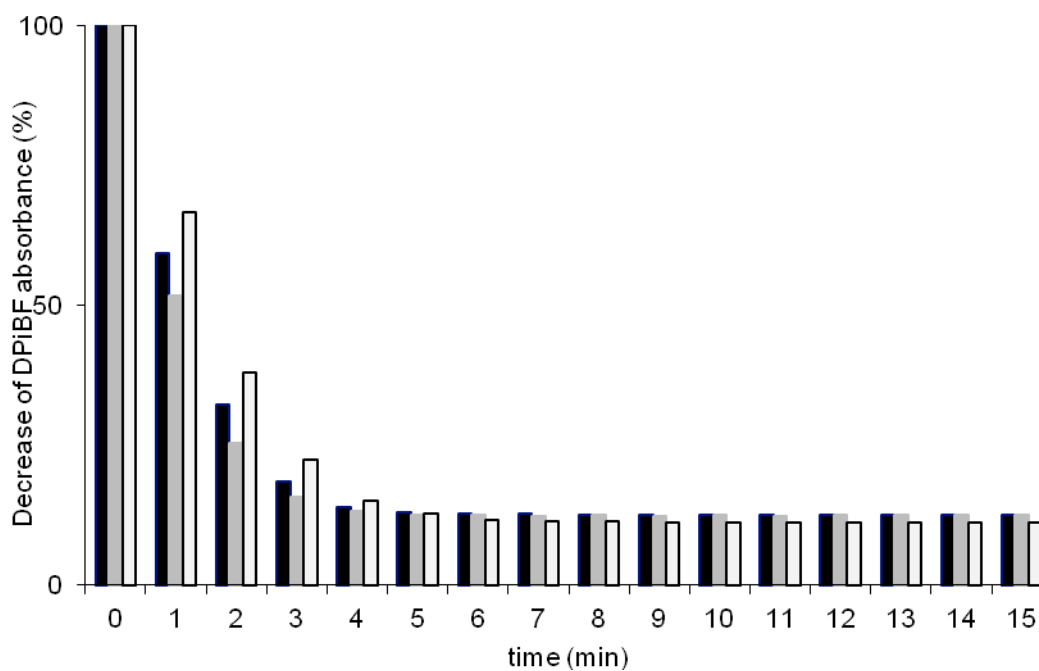

**Figure SI6.** Reduction of DPiBF absorbance with time, in the presence of the non-immobilized GaPFC (light gray), and blends of GaPFC with SiO<sub>2</sub> NPs (medium gray) and of GaPFC with APS-SiO<sub>2</sub> NPs (black).
